# Supplementary material
Source: PubMed Central journal article supplement (PMC3308122)
Supplement: NIHMS358016-supplement-01.pdf [file NIHMS358016-supplement-01.pdf]

# Using Body Mass Index Data in the Electronic Health Record to Calculate Cardiovascular Risk

Beverly B. Green, MD, MPH, Melissa L. Anderson, MS, Andrea J. Cook, PhD, Sheryl Catz, PhD, Paul A. Fishman, PhD, Jennifer B. McClure, PhD, Robert Reid, MD

## Appendix A

### Identifying the study cohort and defining CVD risk scores with EMR data

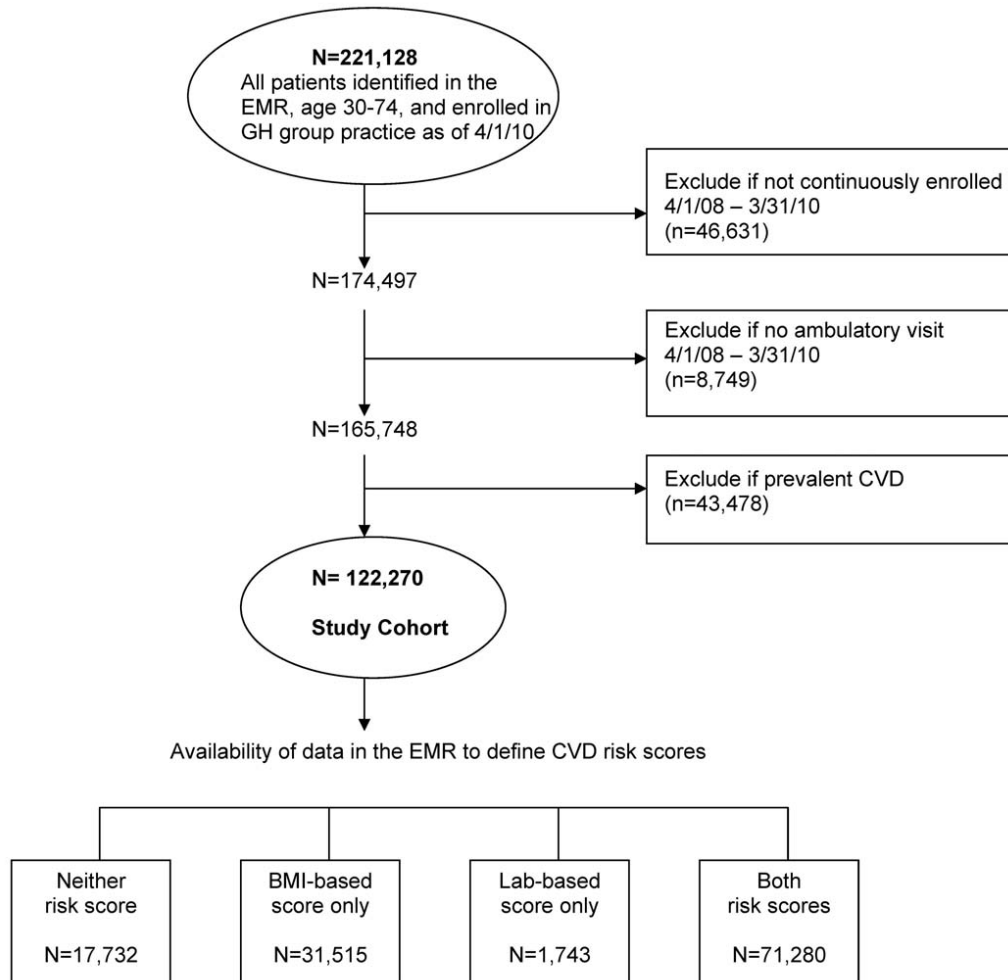

CVD, cardiovascular disease; EMR, electronic medical record; GH, group health

## Appendix B

Scatter plot comparing laboratory cholesterol-based and clinic BMI-based cardiovascular disease risk

Concordance correlation coefficient = 0.867 (95% CI=0.865, 0.868)

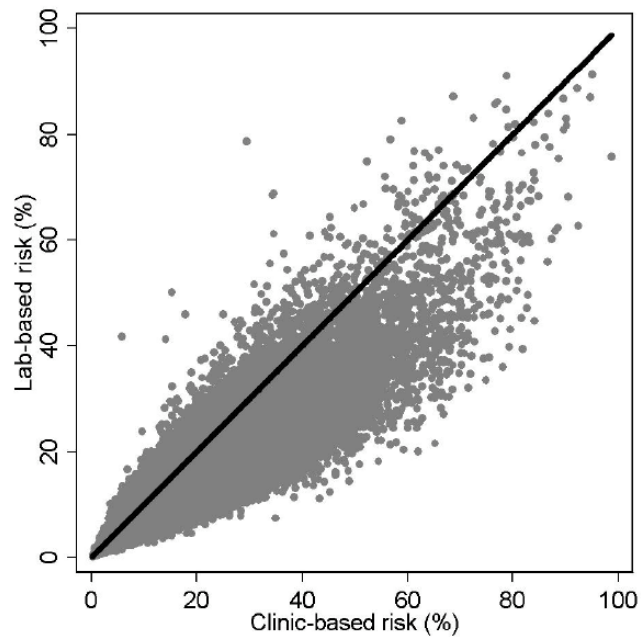

## Appendix C

Comparison of lab-based and BMI-based risk scores by patient characteristics, stratified by gender, and limited to those not on lipid-lowering medications<sup>a</sup> (n=55,933)

|                                            | Difference <sup>a</sup> between continuous risk scores, M (SD) |           | Concordance <sup>b</sup> between categoric risk scores, % |      |
|--------------------------------------------|----------------------------------------------------------------|-----------|-----------------------------------------------------------|------|
|                                            | Female                                                         | Male      | Female                                                    | Male |
| <b>Overall</b>                             | 1.4 (2.4)                                                      | 3.4 (4.6) | 87.9                                                      | 73.0 |
| <b>Age (years)</b>                         |                                                                |           |                                                           |      |
| 30–39                                      | 0.3 (0.7)                                                      | 0.9 (1.5) | 99.5                                                      | 96.2 |
| 40–49                                      | 0.7 (1.3)                                                      | 1.8 (2.8) | 97.3                                                      | 81.4 |
| 50–59                                      | 1.5 (2.2)                                                      | 3.5 (4.3) | 88.1                                                      | 62.7 |
| 60–74                                      | 2.8 (3.3)                                                      | 6.3 (5.8) | 71.4                                                      | 66.1 |
| <b>Diabetes</b>                            |                                                                |           |                                                           |      |
| No                                         | 1.3 (2.1)                                                      | 3.3 (4.4) | 88.7                                                      | 73.0 |
| Yes                                        | 4.9 (5.8)                                                      | 6.4 (7.6) | 65.8                                                      | 73.6 |
| <b>BMI</b>                                 |                                                                |           |                                                           |      |
| <25                                        | 1.0 (1.7)                                                      | 2.6 (3.9) | 92.9                                                      | 76.2 |
| 25–30                                      | 1.2 (2.1)                                                      | 3.0 (4.2) | 88.6                                                      | 74.0 |
| >30                                        | 2.1 (3.0)                                                      | 4.6 (5.3) | 82.2                                                      | 69.8 |
| <b>BP-lowering medications<sup>c</sup></b> |                                                                |           |                                                           |      |
| No                                         | 1.0 (1.7)                                                      | 2.6 (3.7) | 92.4                                                      | 74.5 |
| Yes                                        | 3.0 (3.7)                                                      | 5.9 (6.0) | 71.1                                                      | 68.7 |
| <b>Current smoker</b>                      |                                                                |           |                                                           |      |
| No                                         | 1.4 (2.3)                                                      | 3.2 (4.2) | 88.8                                                      | 73.1 |
| Yes                                        | 2.2 (3.5)                                                      | 4.9 (6.6) | 78.7                                                      | 72.4 |

<sup>a</sup> Difference is defined here as the lab-based score subtracted from the BMI-based score. Positive differences indicate the BMI-based score is larger than the lab-based score.

<sup>b</sup> Concordance is the proportion for which the lab-based risk category matched the clinic-based risk.

<sup>c</sup> At least one prescription filled in the past year

BP, blood pressure
